# Supplementary material
Source: PubMed Central journal article supplement (PMC4284538)
Supplement: pnas.201414026SI.pdf [file pnas.201414026SI.pdf]

# Supporting Information

Babtie et al. 10.1073/pnas.1414026112

## SI Materials and Methods

**GP Regression.** We use GP regression, a nonparametric Bayesian method for nonlinear regression, to model the concentration of each species as a function of time,  $x_n(t)$ , and the corresponding derivatives,  $\dot{x}_n(t)$ , from time course data for each species. For our application, data are simulated from the initial candidate ODE model we wish to analyze for sensitivity to topological alterations. We used MATLAB functions from the GPML Toolbox (1, 2) to infer hyperparameters and fit the GP regression models.

A GP is a collection of random variables, any finite subset of which follows a multivariate Gaussian distribution (2). For GP regression we assume a GP prior over a function, denoted, e.g.,

$$x_n(\mathbf{t}) \sim \mathcal{GP}(m(\mathbf{t}), k(\mathbf{t}, \mathbf{t}')), \quad [\text{S1}]$$

where  $m(\mathbf{t})$  is a mean function for the values taken by variable  $x_n$  at times  $\mathbf{t}$  and  $k(\mathbf{t}, \mathbf{t}')$  is a covariance function. We use a zero-mean function and a squared covariance function,

$$k(t_i, t_j) = \sigma_f^2 \exp\left(-\frac{(t_i - t_j)^2}{2\ell^2}\right), \quad [\text{S2}]$$

where  $\sigma_f$  and  $\ell$  are hyperparameters defining the distribution. We assume the data are subject to normally distributed noise with constant variance  $\sigma_\epsilon^2$ , thus inducing a GP prior over the observed outputs for species  $n$ ,  $y_n(\mathbf{t})$ ,

$$y_n(\mathbf{t}) \sim \mathcal{GP}(m_y(\mathbf{t}), k_y(\mathbf{t}, \mathbf{t}')), \quad [\text{S3}]$$

with  $m_y(t_i) = m(t_i)$  and  $k_y(t_i, t_j) = k(t_i, t_j) + \sigma_\epsilon^2 \delta_{ij}$ , where  $\delta_{ij}$  is the Kronecker delta function.

Given the assumed GP prior and noise model we can write the joint distribution,

$$\begin{bmatrix} \mathbf{y}_n \\ \mathbf{x}_n^* \end{bmatrix} \sim \mathcal{N}\left(\begin{bmatrix} \mathbf{m} \\ \mathbf{m}_* \end{bmatrix}, \begin{pmatrix} K + \sigma_\epsilon^2 I & K_{*o} \\ K_{*o} & K_{**} \end{pmatrix}\right), \quad [\text{S4}]$$

where  $\mathbf{y}_n = [y_n(t_1), \dots, y_n(t_s)]^T$  is a set of observed outputs at times  $t_1, \dots, t_s$ ;  $\mathbf{x}_n^* = [x_n(t_1^*), \dots, x_n(t_r^*)]^T$  for any finite set of time points  $t_1^*, \dots, t_r^*$ ;  $\mathbf{m} = [m(t_1), \dots, m(t_s)]^T$  and  $\mathbf{m}_* = [m(t_1^*), \dots, m(t_r^*)]^T$  are vectors specified by the mean function  $m(t)$ ;  $I$  is the  $s \times s$  identity matrix; and entries in the covariance matrices are given by

$$\begin{aligned} K_{ij} &= k(t_i, t_j), \\ (K_{*o})_{ij} &= k(t_i, t_j^*), \\ (K_{*o})_{ij} &= k(t_i^*, t_j), \\ (K_{**})_{ij} &= k(t_i^*, t_j^*). \end{aligned}$$

We can specify the likelihood  $p(\mathbf{y}_n)$  as

$$p(\mathbf{y}_n) = \frac{1}{(2\pi)^{s/2} |K + \sigma_\epsilon^2 I|^{1/2}} \exp\left(-\frac{1}{2}(\mathbf{y}_n - \mathbf{m})^T (K + \sigma_\epsilon^2 I)^{-1} (\mathbf{y}_n - \mathbf{m})\right). \quad [\text{S5}]$$

Following the method of Rasmussen and Williams (2), we determine values for the GP hyperparameters ( $\sigma_f, \ell, \sigma_\epsilon$ ) by maximizing the likelihood function with respect to these parameters.

We obtain the posterior distribution for our function  $x_n(\mathbf{t})$  by updating the GP prior using the observed dataset  $\mathbf{y}_n$ . From the joint distribution in Eq. S4 we can specify the GP posterior for  $x_n(t)$  conditioned on the observed data:

$$[x_n(t_1^*), \dots, x_n(t_r^*)]^T | \mathbf{y}_n \sim \mathcal{N}(\mathbf{m}_{post}, K_{post}), \quad [\text{S6}]$$

where

$$\mathbf{m}_{post} = \mathbf{m}_* + K_{*o} (K + \sigma_\epsilon^2 I)^{-1} (\mathbf{y}_n - \mathbf{m}),$$

$$K_{post} = K_{**} - K_{*o} (K + \sigma_\epsilon^2 I)^{-1} K_{*o}.$$

Using this approach, we can sample realizations of the function  $x_n(t)$  at any chosen time point.

Similarly, we can specify the joint distribution of the corresponding derivative  $\dot{x}_n(t)$  and the observed data  $\mathbf{y}_n$  to obtain the GP posterior distribution for the derivative,

$$\begin{bmatrix} \dot{x}_n(t_1), \dots, \dot{x}_n(t_s) \end{bmatrix}^T | \mathbf{y}_n \sim \mathcal{N}\left(L_{DF} (K + \sigma_\epsilon^2 I)^{-1} \mathbf{y}_n, M - L_{DF} (K + \sigma_\epsilon^2 I)^{-1} L_{DF}\right), \quad [\text{S7}]$$

where covariance matrix entries are defined by

$$K_{ij} = k(t_i, t_j), \quad [\text{S8}]$$

$$(L_{FD})_{ij} = \text{cov}(x_n(t_i), \dot{x}_n(t_j)) = \frac{d}{dt_j} k(t_i, t_j) = \frac{(t_i - t_j)}{\ell^2} K_{ij}, \quad [\text{S9}]$$

$$(L_{DF})_{ij} = \text{cov}(\dot{x}_n(t_i), x_n(t_j)) = \frac{d}{dt_i} k(t_i, t_j) = \frac{(t_j - t_i)}{\ell^2} K_{ij}, \quad [\text{S10}]$$

$$(M)_{ij} = \text{cov}(\dot{x}_n(t_i), \dot{x}_n(t_j)) = \frac{d^2}{dt_i dt_j} k(t_i, t_j) = \left(\frac{1}{\ell^2} - \frac{(t_i - t_j)^2}{\ell^4}\right) K_{ij}. \quad [\text{S11}]$$

Here we assumed a zero-mean function for  $m(t)$  and only considered the time points  $t_1, \dots, t_s$  of the observed data points to simplify the notation. Samples of the derivative function at other time points were obtained by calculating the corresponding covariance matrix entries.

**Simulation Parameters for Synthetic Datasets.** Data in Fig. 3 were simulated from model A with parameters  $s_n = 0.2$ ,  $\beta_{nk} = 2$ ,  $m_{nk} = 5$ , and  $\theta_{nk} = 1.5$  for all  $n, k$ ; and values for  $\gamma_n$  given by the  $n$ th component of vector  $\boldsymbol{\gamma} = [0.9, 0.9, 0.7, 1.5, 1.5]$ . Initial concentrations of species in the system were set to  $\mathbf{x}(0) = [1, 0.5, 1, 0.5, 0.5]$ .

Trajectories in Fig. S2B were simulated from model A with parameters  $s_n$  and  $\gamma_n$  given by the  $n$ th components of vectors  $\mathbf{s} = [0.5, 0.5, 0.2, 0.2, 0.2]$  and  $\boldsymbol{\gamma} = [0.9, 0.9, 0.7, 0.5, 1.3]$ , respectively, and the parameters associated with interactions set to  $(\beta_{15}, \beta_{21}, \beta_{31}, \beta_{41}, \beta_{43}, \beta_{52}, \beta_{54}) = (2, 1.5, 3, 1, 2, 2, 2)$ ,  $(\theta_{15}, \theta_{21}, \theta_{31}, \theta_{41}, \theta_{43}, \theta_{52}, \theta_{54}) = (1, 1, 1, 1, 2, 1.5, 1.5)$ , and  $(m_{15}, m_{21}, m_{31}, m_{41}, m_{43}, m_{52}, m_{54}) = (3, 2, 2, 2, 3, 1, 4)$ . Initial species concentrations were set to  $\mathbf{x}(0) = [0.1, 0.5, 1, 0.5, 0.5]$  for condition 1 and  $\mathbf{x}(0) = [0.1, 0.1, 0, 3, 2.5]$  for condition 2.

Fig. 4A data were simulated from model B with parameters  $r_n$  given by  $\mathbf{r} = [0.3, 0.7, 0.5, 0.4, 0.4]$ , and  $(a_{13}, a_{15}, a_{24}, a_{42}, a_{43}, a_{52}) = (0.4, 0.7, 1.5, 1.4, 0.7, 1.2)$ . Initial species populations were set to  $\mathbf{x}(0) = [0.2, 0.5, 0.2, 0.2, 0.3]$ .

Data used for Bayesian inference (Fig. S4) were simulated from model C with parameters  $\mathbf{r} = [0.3, 0.7, 0.5, 0.4, 0.4]$  and  $(a_{12}, a_{14}, a_{21}, a_{23}, a_{31}, a_{34}, a_{41}, a_{45}, a_{51}, a_{54}) = (0.4, 0.3, 1.5, 1.4, 0.7, 1.2, 0.6, 1.5, 1.1, 0.2)$ .

During gradient-matching parameter estimation, the allowed values for parameters were constrained by the limits  $0.1 \leq s_n \leq 1$ ,  $0.1 \leq \gamma_n \leq 2$ ,  $0.5 \leq \beta_{nk} \leq 4$ ,  $0.2 \leq \theta_{nk} \leq 3$ , and  $0.7 \leq m_{nk} \leq 5$  for gene regulatory network models, and  $0.1 \leq r_n \leq 2$  and  $0.1 \leq a_{nk} \leq 5$  for competitive population dynamics models.

**Parameter Inference.** We used one of the following methods (as stated in the main text) to infer model parameters from the synthetic or experimental datasets. In all cases we specified likelihoods by assuming Gaussian noise with fixed variance.

**Maximum likelihood estimation plus parametric bootstrap.** Maximum likelihood estimates for the parameters were obtained from the original dataset and used to simulate trajectories for all species; replicate datasets were generated based on these trajectories assuming additive Gaussian noise. We obtained parameter estimates from each replicate dataset using constrained optimization to generate approximate sampling distributions for each parameter (3).

**Nested sampling.** Nested sampling is an algorithm developed by Skilling (4) to estimate the evidence for a particular model which also provides samples from the posterior distribution. We used a C implementation of the algorithm (5) with uniform priors for all parameters and a random walk sampling algorithm.

**Metropolis–Hastings.** This is a Markov chain Monte Carlo method that enables sampling from the joint posterior distribution (6, 7); we used a Gaussian transition kernel to generate parameter proposals, and uniform priors for all parameters.

**Laplace approximation.** This method approximates the posterior by a multivariate normal probability density function. Although unlikely to be a good global approximation of the posterior, it may nevertheless provide a good local approximation in the region of the estimated parameter vector (obtained using constrained optimization techniques, as in “Maximum likelihood estimation plus parametric bootstrap” above). We used the R implementation provided in the LaplacesDemon package (8).

## SI Results

**Automated Model Generation and Ranking.** As described in the main text, we construct and rank all possible component equations that describe the dynamics of each species in a system using gradient-matching parameter estimation. Fig. S24 illustrates the rankings of the 165 possible component equations calculated using the oscillating GP regression model trajectories displayed in Fig. 3 (main text), and the rules described in the accompanying section of the main text (titled “Automated Model Generation and Ranking”). We combine component equations for each species to create a set of coupled ODEs describing the dynamics of the complete system. As shown in Fig. 3 (main text), the best model accurately captures the desired dynamics, whereas lower-ranked models deviate from these trajectories. The “top-ranked ODE” in Fig. 3 was created by combining the top-ranked component model for each species, whereas the exemplar “lower-ranked ODE” was constructed by combining the eighth-ranked component equations. For clarity, in Fig. 3 we only show simulations from two possible ODE models, but there are many alternative highly ranked models that also produce the desired dynamics displayed by the best model.

The relative rankings of models depend on the particular dataset to which they are fitted during this parameter estimation step. If we have multiple simulations from our candidate model,

corresponding to the known behavior of the modeled system under different experimental conditions, we can use this information to reduce the set of compatible models. For example, Fig. S2B shows trajectories simulated from model A using identical parameter values but two different initial conditions (see *SI Materials and Methods* for simulation parameters). As before, we generate the same  $33 \times 5 = 165$  component equations, which combine to give  $33^5 = 3.9 \times 10^7$  possible complete ODE models, and rank these complete models under each condition (Fig. S2 C and D). Although there is some correlation between the rankings, adding additional datasets clearly identifies a smaller group of models with dynamics consistent with the data-generating model.

**Parametric Bootstrap Distributions.** Fig. S3 extends Fig. 4B from the main text, by showing bootstrap distributions for all parameters present in the true model.

**Bayesian Inference.** Additional Bayesian inference results are given here for the best close models selected by nested sampling—those with estimated evidence (Table S1) greater than or equal to the true model (model C, Fig. 2), and differing by just a single edge. Posterior samples were obtained using two algorithms, Metropolis–Hastings and nested sampling, with the same artificial dataset.

**Selection of Models for Yeast Gene Expression Data.** We constructed an initial candidate model for the dynamics of clustered yeast gene expression profiles (data from ref. 9) using the network inference approach described by Lu et al. (10), as implemented in D-NetWeaver (11). We sampled ODE models with  $X$  edges randomly rewired, relative to this initial candidate model, to find alternative models with consistent dynamics. To do this,  $X$  nonzero entries in connectivity matrix  $A$  (each corresponding to an interaction) were chosen at random to delete, and replaced by new interactions absent from the initial model; in this way model complexity (measured as the total number of edges and parameters) remained constant across all tested models.

We sampled  $5 \times 10^4$  rewired models for each of  $X = 1, 2, 3, 5, 10, 20$ , or 30 rewired edges, and estimated the associated parameters by gradient matching [using GP regression estimates of concentrations  $\hat{\mathbf{x}}(t)$  and derivatives  $\hat{\dot{\mathbf{x}}}(t)$ , calculated from trajectories simulated from the initial candidate model]. The top 50 models within each rewiring category were selected based on log-likelihood values calculated using the gradient-matching parameter estimates ( $\theta_{GM}$ ); this provided a group of 350 models, in addition to our initial candidate model, for further analysis.

To assess the robustness of parameter estimation to topological alterations, we then used constrained optimization (using the `fmincon` function in MATLAB, with parameter bounds of  $\pm 5$ , and initializing the algorithm at the corresponding gradient-matching parameter estimates,  $\theta_{GM}$ ) to obtain maximum likelihood estimates of the parameters for each of the 351 models, by fitting to the cluster means. We denote these estimates by  $\theta_{OPT1}$ .

To allow for the possibility that, for some of the models, the optimization algorithm may only have converged to a local optimum, we performed a second round of optimization for each model, using alternative starting points. To obtain “good” alternative starting points for each model, we made use of the set of all 351 estimates  $\theta_{OPT1}$  (one for each model), and took the median for each parameter (calculated from  $\theta_{OPT1}$ , over all of the 351 models in which it appears). We denote the resulting estimates by  $\theta_{OPT2}$ .

Finally, for each model we chose whichever of  $\theta_{OPT1}$  and  $\theta_{OPT2}$  had the higher likelihood value (in most cases this was  $\theta_{OPT1}$ , but in a few cases  $\theta_{OPT2}$  provided a marginal improvement).

Despite performing a restart of the optimization algorithm, we still cannot be entirely certain that the final parameter estimate

for each model corresponds to the true global maximum likelihood estimate. This problem is ubiquitous in maximum likelihood estimation problems. As a result of this, we cannot strictly say that we are performing a topological sensitivity analysis of the true (global) maximum likelihood parameter estimate. Instead, we are performing a TSA of the parameter estimates provided by an algorithm that targets the true maximum likelihood estimate (MLE). This accurately reflects what will generally be possible in

practice, because (for any realistic practical problem) all that will be available is the output of such an algorithm, which cannot be guaranteed to be equal to the global MLE. TSA as performed here then lends increased credibility to those model features that are supported by all or, more likely, the majority of models. Any aspect that is only displayed by a few of the models, by contrast, ought to either be viewed with skepticism or be investigated further, ideally in carefully designed experiments (12, 13).

- Rasmussen CE, Nickisch H (2010) Gaussian processes for machine learning (GPML) toolbox. *J Mach Learn Res* 11:3011–3015.
- Rasmussen CE, Williams CKI (2006) *Gaussian Processes for Machine Learning* (MIT Press, Cambridge, MA).
- Murphy KP (2012) *Machine Learning. A Probabilistic Perspective* (MIT Press, Cambridge, MA).
- Skilling J (2006) Nested sampling for general Bayesian computation. *Bayesian Anal* 1(4):833–860.
- Johnson R, Kirk P, Stumpf MPH (2014) SYSBIONS: Nested sampling for systems biology. *Bioinformatics*, 10.1093/bioinformatics/btu675.
- Hastings WK (1970) Monte Carlo sampling methods using Markov chains and their applications. *Biometrika* 57(1):97–109.
- Wilkinson DJ (2011) *Stochastic Modelling for Systems Biology* (CRC Press, Boca Raton, FL), 2nd Ed.
- Statistik LLC (2014) LaplacesDemon: Complete Environment for Bayesian Inference. [www.bayesian-inference.com/software](http://www.bayesian-inference.com/software), R package Version 14.06.23.
- Spellman PT, et al. (1998) Comprehensive identification of cell cycle-regulated genes of the yeast *Saccharomyces cerevisiae* by microarray hybridization. *Mol Biol Cell* 9(12):3273–3297.
- Lu T, Liang H, Li H, Wu H (2011) High dimensional ODEs coupled with mixed-effects modeling techniques for dynamic gene regulatory network identification. *J Am Stat Assoc* 106(496):1242–1258.
- Wu S, Liu Z-P, Qiu X, Wu H (2014) Modeling genome-wide dynamic regulatory network in mouse lungs with influenza infection using high-dimensional ordinary differential equations. *PLoS ONE* 9(5):e95276.
- Liepe J, Filippi S, Komorowski M, Stumpf MPH (2013) Maximizing the information content of experiments in systems biology. *PLoS Comput Biol* 9(1):e1002888.
- Silk D, Kirk PDW, Barnes CP, Toni T, Stumpf MPH (2014) Model selection in systems biology depends on experimental design. *PLoS Comput Biol* 10(6):e1003650.

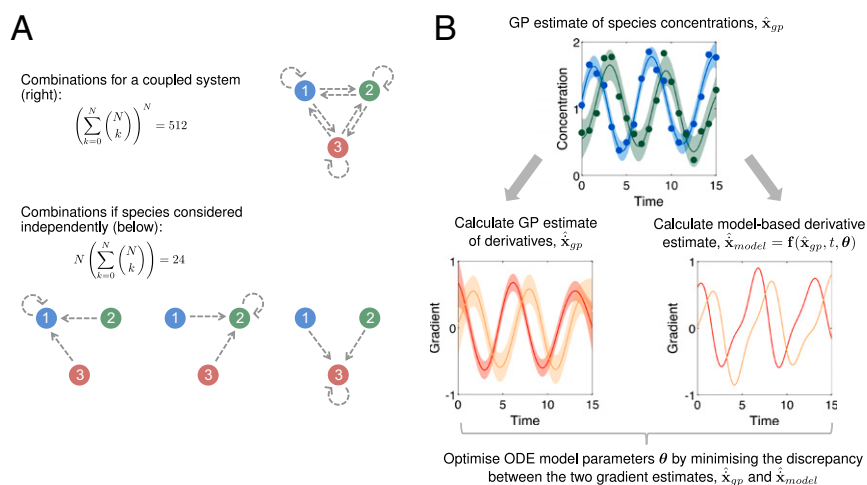

**Fig. S1.** Reducing combinatorial complexity using gradient-matching parameter estimation. (A) Considering the regulation of each species independently reduces the search space of possible models. For a system with 3 species and interactions possible between any pair of species (including self-interaction) there are 512 possible topologies for the complete network. If we always consider the complete ODE system (i.e., the complete set of parent sets,  $\mathcal{C}$ ) we would need to test 512 models to do an exhaustive search. We can reduce this search space by considering the possible parent sets  $\text{Pa}(x_n)$  for each species  $n$  independently; for this example there are 8 possible parent sets for each species so we only need to test 24 models to search all possible network topologies. We obtain the overall network topology by combining a selected parent set for each species to obtain the complete set  $\mathcal{C}$ . (B) Overview of the gradient-matching parameter estimation method. GP regression models are fitted to time course data (circles) for all species, in this case two, to provide estimates of species concentrations  $\hat{x}_{gp}(t)$ . GP estimates for the corresponding derivatives  $\hat{x}_{gp}$  are also calculated. A second model-derived estimate of the derivatives  $\hat{x}_{model}(t)$  is calculated using the GP estimates of species concentrations and the ODE model,  $f(\hat{x}_{gp}, t, \theta)$ . ODE model parameters  $\theta$  are estimated by minimizing the discrepancy between the data-driven and model-driven estimates of the derivatives ( $\hat{x}_{gp}$  and  $\hat{x}_{model}$ , respectively) using a constrained optimization algorithm or linear regression as appropriate (the `fmincon` or `fitlm` MATLAB functions, respectively).



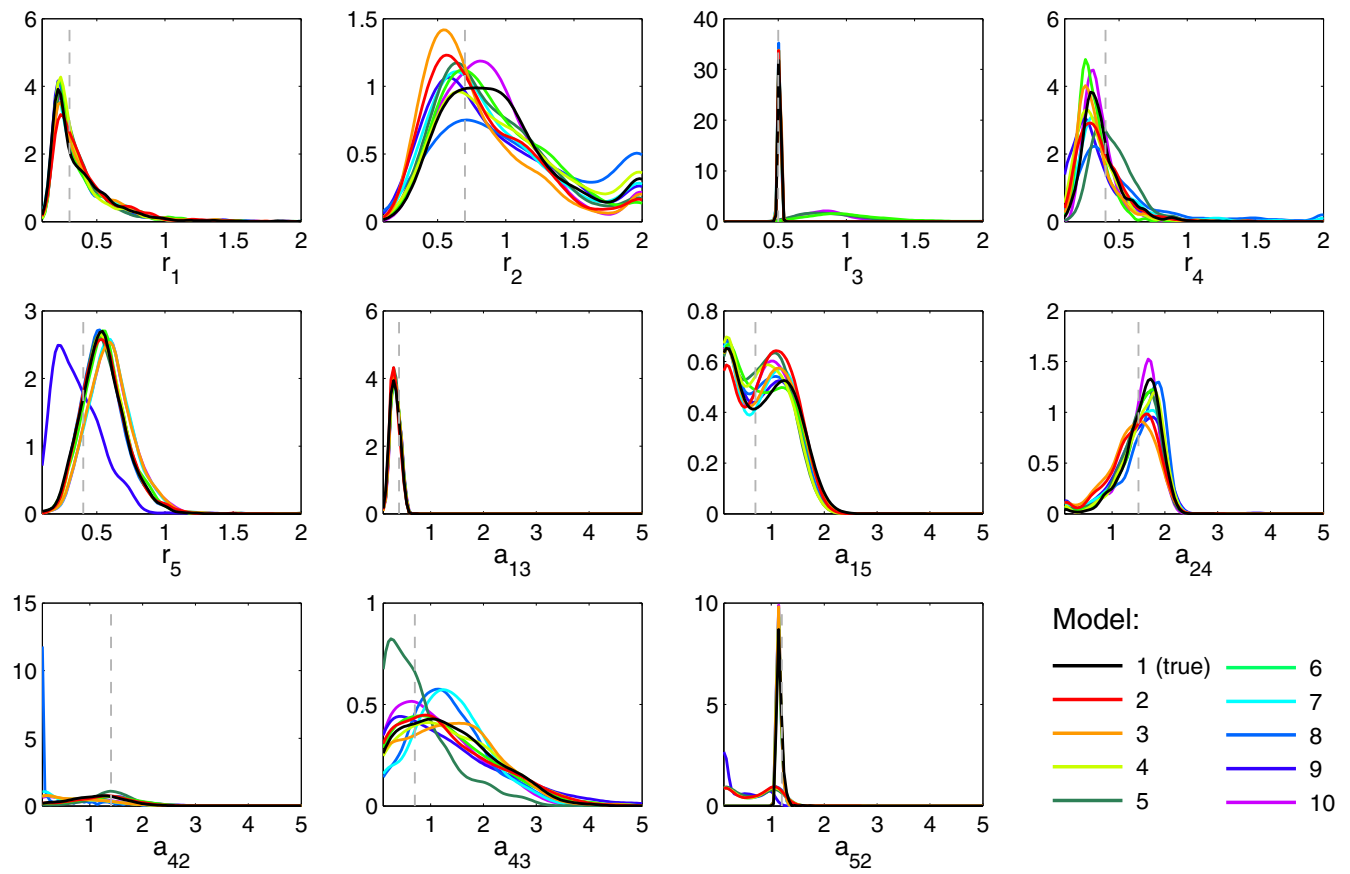

**Fig. S3.** Comparison of parametric bootstrap distributions obtained for the parameters present in the true model (model 1) using the top 10 complete ODE models (ranked by  $AIC_c$  values). Solid lines indicate kernel density estimates of the distributions obtained for each of the alternative model structures; vertical gray lines indicate the true model parameters used to simulate the noisy dataset. Horizontal axes are limited to the parameter ranges allowed during constrained optimization.
